# Supplementary material for: An experimental and theoretical magneto-structural study of polynuclear NiII complexes assembled from a versatile bis(salicylaldehyde)diamine polytopic ligand
Source: Royal Society of Chemistry journal article supplement (doi:10.1039/c5dt00356c), 2015-01-01
Supplement: c5dt00356c1.pdf [file c5dt00356c1.pdf]

## **Electronic Supporting Information**

**An Experimental and Theoretical Magneto-Structural Study of  
Polynuclear Ni<sup>II</sup> Complexes Assembled from a Versatile  
bis(salicylaldehyde)diamine Polytopic Ligand.**

**Itziar Oyarzabal, José Ruiz, Antonio J. Mota, Antonio Rodríguez-Diéguez, José M. Seco,  
Enrique Colacio**

**Table S1.** Crystallographic data for complexes **1-6**.

| Compound                                                 | <b>1</b>                                                                          | <b>2</b>                                                                                      | <b>3</b>                                                                                       | <b>4</b>                                                                                        | <b>5</b>                                                                                       | <b>6</b>                                                                                        |
|----------------------------------------------------------|-----------------------------------------------------------------------------------|-----------------------------------------------------------------------------------------------|------------------------------------------------------------------------------------------------|-------------------------------------------------------------------------------------------------|------------------------------------------------------------------------------------------------|-------------------------------------------------------------------------------------------------|
| Formula                                                  | C <sub>20</sub> H <sub>26</sub> N <sub>4</sub> O <sub>12</sub> Br <sub>2</sub> Ni | C <sub>32</sub> H <sub>39</sub> N <sub>3</sub> O <sub>9</sub> Br <sub>2</sub> Ni <sub>2</sub> | C <sub>23</sub> H <sub>23</sub> N <sub>3</sub> O <sub>6</sub> SBr <sub>2</sub> Ni <sub>2</sub> | C <sub>50</sub> H <sub>61</sub> N <sub>11</sub> O <sub>17</sub> Br <sub>2</sub> Ni <sub>3</sub> | C <sub>48</sub> H <sub>72</sub> N <sub>4</sub> O <sub>22</sub> Br <sub>4</sub> Ni <sub>4</sub> | C <sub>45</sub> H <sub>54</sub> N <sub>10</sub> O <sub>15</sub> Br <sub>4</sub> Ni <sub>4</sub> |
| <i>M<sub>r</sub></i>                                     | 732.98                                                                            | 886.90                                                                                        | 746.74                                                                                         | 1583.87                                                                                         | 1611.58                                                                                        | 1529.46                                                                                         |
| Crystal system                                           | Monoclinic                                                                        | Monoclinic                                                                                    | Monoclinic                                                                                     | Monoclinic                                                                                      | Triclinic                                                                                      | Triclinic                                                                                       |
| Space group (no.)                                        | <i>P21/c</i> (14)                                                                 | <i>C2/c</i> (15)                                                                              | <i>I2/a</i> (15)                                                                               | <i>P21/c</i> (14)                                                                               | <i>P-1</i> (2)                                                                                 | <i>P-1</i> (2)                                                                                  |
| <i>a</i> (Å)                                             | 12.3321(6)                                                                        | 20.9791(14)                                                                                   | 21.9768(3)                                                                                     | 21.6387(9)                                                                                      | 11.7285(10)                                                                                    | 13.3880(4)                                                                                      |
| <i>b</i> (Å)                                             | 9.5827(4)                                                                         | 14.469(2)                                                                                     | 9.7423(10)                                                                                     | 10.6943(12)                                                                                     | 12.3966(13)                                                                                    | 14.4846(5)                                                                                      |
| <i>c</i> (Å)                                             | 21.5074(9)                                                                        | 26.9753(19)                                                                                   | 24.826(4)                                                                                      | 27.2254(7)                                                                                      | 12.6195(15)                                                                                    | 14.9568(5)                                                                                      |
| $\alpha$ (°)                                             | 90.00                                                                             | 90.00                                                                                         | 90.00                                                                                          | 90.00                                                                                           | 89.018(9)                                                                                      | 106.726(3)                                                                                      |
| $\beta$ (°)                                              | 94.157(4)                                                                         | 118.361(9)                                                                                    | 95.237(2)                                                                                      | 111.474(2)                                                                                      | 70.217(9)                                                                                      | 95.185(3)                                                                                       |
| $\gamma$ (°)                                             | 90.00                                                                             | 90.00                                                                                         | 90.00                                                                                          | 90.00                                                                                           | 64.859(9)                                                                                      | 93.111(3)                                                                                       |
| <i>V</i> (Å <sup>3</sup> )                               | 2534.95(19)                                                                       | 7205.3(13)                                                                                    | 5293.2(10)                                                                                     | 5862.9(7)                                                                                       | 1545.6(3)                                                                                      | 2756.53(16)                                                                                     |
| <i>Z</i>                                                 | 4                                                                                 | 8                                                                                             | 8                                                                                              | 4                                                                                               | 1                                                                                              | 2                                                                                               |
| <i>D<sub>c</sub></i> (g cm <sup>-3</sup> )               | 1.921                                                                             | 1.635                                                                                         | 1.874                                                                                          | 1.794                                                                                           | 1.731                                                                                          | 1.843                                                                                           |
| $\mu$ (MoK $\alpha$ ) (mm <sup>-1</sup> ) <sup>a</sup>   | 3.990                                                                             | 3.318                                                                                         | 6.426                                                                                          | 3.759                                                                                           | 5.046                                                                                          | 4.318                                                                                           |
| <i>T</i> (K)                                             | 100(2)                                                                            | 100(2)                                                                                        | 100(2)                                                                                         | 100(2)                                                                                          | 100(2)                                                                                         | 100(2)                                                                                          |
| Observed reflections                                     | 5889 (4775)                                                                       | 6345 (5721)                                                                                   | 5329 (4677)                                                                                    | 10308 (7841)                                                                                    | 6058 (4762)                                                                                    | 9673 (7112)                                                                                     |
| <i>R<sub>int</sub></i>                                   | 0.0438                                                                            | 0.0247                                                                                        | 0.0357                                                                                         | 0.0414                                                                                          | 0.0267                                                                                         | 0.0323                                                                                          |
| Parameters                                               | 378                                                                               | 466                                                                                           | 337                                                                                            | 748                                                                                             | 329                                                                                            | 694                                                                                             |
| <i>GOF</i>                                               | 1.109                                                                             | 1.107                                                                                         | 1.031                                                                                          | 1.038                                                                                           | 1.094                                                                                          | 1.058                                                                                           |
| <i>R<sub>1</sub></i> <sup>b,c</sup>                      | 0.0560 (0.0400)                                                                   | 0.0349 (0.0299)                                                                               | 0.0538 (0.0467)                                                                                | 0.0608 (0.0399)                                                                                 | 0.0556 (0.0447)                                                                                | 0.0744 (0.0496)                                                                                 |
| <i>wR<sub>2</sub></i> <sup>c,d</sup>                     | 0.0909 (0.0843)                                                                   | 0.0687 (0.0666)                                                                               | 0.1071 (0.1030)                                                                                | 0.0934 (0.0862)                                                                                 | 0.1298 (0.1239)                                                                                | 0.1302 (0.1192)                                                                                 |
| Largest difference in peak and hole (e Å <sup>-3</sup> ) | 1.220 and -0.638                                                                  | 0.920 and -0.544                                                                              | 2.544 and -1.891                                                                               | 1.175 and -0.760                                                                                | 1.744 and -1.010                                                                               | 1.037 and -0.894                                                                                |

<sup>a</sup>  $\mu$  (CuK $\alpha$ ) (mm<sup>-1</sup>) in **3** and **5**.<sup>b</sup>  $R_1 = \sum ||F_o| - |F_c|| / \sum |F_o|$ .<sup>c</sup> Values in parentheses for reflections with  $I > 2\sigma(I)$ .<sup>d</sup>  $wR_2 = \{\sum [w(F_o^2 - F_c^2)^2] / \sum [w(F_o^2)^2]\}^{1/2}$

**Table S2.** Selected bond lengths (Å) and angles (°) for complexes **1-6**.

| <b>Compound</b> | <b>1</b> | <b>2</b> | <b>3</b> | <b>4</b> | <b>5</b> | <b>6</b> |
|-----------------|----------|----------|----------|----------|----------|----------|
| Ni(1)-O(1A)     | 2.039(2) |          |          |          |          |          |
| Ni(1)-O(2A)     | 1.965(2) | 2.125(2) | 2.018(3) | 2.059(3) | 2.066(3) | 2.040(4) |
| Ni(1)-O(3A)     | 1.981(2) | 2.060(2) | 1.982(3) | 2.020(3) | 2.109(3) | 2.112(4) |
| Ni(1)-O(4A)     | 2.041(2) |          |          |          |          |          |
| Ni(1)-O(1C)     | 2.123(2) |          |          |          |          |          |
| Ni(1)-O(1W)     | 2.074(3) |          |          |          |          |          |
| Ni(1)-O(1B)     |          | 2.040(2) | 1.943(3) |          | 2.065(3) | 2.057(4) |
| Ni(1)-O(2B)     |          | 2.011(3) |          |          |          |          |
| Ni(1)-O(1P)     |          |          |          | 2.137(3) |          |          |
| Ni(1)-O(1M)     |          |          |          |          | 2.058(3) |          |
| Ni(1)-N(1A)     |          | 2.130(2) | 2.047(4) | 2.066(3) | 2.114(3) | 2.098(5) |
| Ni(1)-N(2A)     |          | 2.135(2) | 2.066(3) | 2.096(3) | 2.126(3) | 2.104(5) |
| Ni(1)-N(1P)     |          |          |          | 2.077(4) |          |          |
| Ni(1)-N(1C)     |          |          |          |          |          | 2.113(5) |
| Ni(2)-O(1A)     |          | 2.058(3) | 2.041(3) | 2.007(3) | 2.065(3) | 2.047(4) |
| Ni(2)-O(2A)     |          | 2.032(2) | 2.019(3) | 1.983(3) | 2.021(3) | 2.017(4) |
| Ni(2)-O(3A)     |          | 2.058(2) | 2.014(3) |          |          |          |
| Ni(2)-O(3A)*    |          |          |          |          | 2.094(3) | 2.075(4) |
| Ni(2)-O(4A)     |          |          | 2.052(3) |          |          |          |
| Ni(2)-O(1B)     |          |          |          | 2.008(3) |          |          |
| Ni(2)-O(2B)     |          |          | 2.079(3) | 1.985(3) | 2.043(3) | 2.008(4) |
| Ni(2)-O(1C)     |          | 1.980(2) |          |          |          |          |
| Ni(2)-O(2C)     |          | 2.016(2) |          |          |          |          |
| Ni(2)-O(1W)     |          | 2.091(2) |          |          |          |          |
| Ni(2)-O(1M)     |          |          |          |          | 2.065(3) |          |
| Ni(2)-O(1M)*    |          |          |          |          | 2.024(3) |          |
| Ni(2)-O(1P)     |          |          |          | 2.119(3) |          |          |
| Ni(2)-O(2P)     |          |          |          | 2.129(3) |          |          |
| Ni(2)-N(1C)     |          |          | 2.015(4) |          |          | 2.129(4) |
| Ni(2)-N(1C)*    |          |          |          |          |          | 2.081(4) |
| Ni(3)-O(2B)     |          |          |          | 2.071(3) |          |          |
| Ni(3)-O(3B)     |          |          |          | 2.034(3) |          |          |
| Ni(3)-O(2D)     |          |          |          |          |          | 2.065(4) |
| Ni(3)-O(3D)     |          |          |          |          |          | 2.133(4) |
| Ni(3)-O(1E)     |          |          |          |          |          | 2.063(4) |
| Ni(3)-O(2P)     |          |          |          | 2.127(3) |          |          |
| Ni(3)-O(1W)     |          |          |          | 2.113(3) |          |          |
| Ni(3)-N(1B)     |          |          |          | 2.065(3) |          |          |
| Ni(3)-N(2B)     |          |          |          | 2.107(3) |          |          |
| Ni(3)-N(1D)     |          |          |          |          |          | 2.103(5) |
| Ni(3)-N(2D)     |          |          |          |          |          | 2.115(5) |
| Ni(3)-N(1F)     |          |          |          |          |          | 2.111(5) |
| Ni(4)-O(1D)     |          |          |          |          |          | 2.044(4) |
| Ni(4)-O(2D)     |          |          |          |          |          | 2.016(4) |
| Ni(4)-O(3D)*    |          |          |          |          |          | 2.072(4) |
| Ni(4)-O(2E)     |          |          |          |          |          | 1.995(4) |
| Ni(4)-N(1F)     |          |          |          |          |          | 2.156(5) |
| Ni(4)-N(1F)*    |          |          |          |          |          | 2.082(5) |

|                    |           |          |          |          |          |
|--------------------|-----------|----------|----------|----------|----------|
| Ni(1)···Ni(2)      | 3.203(1)  | 2.954(1) | 3.118(1) | 3.009(1) | 3.026(1) |
| Ni(1)···Ni(2)*     |           |          |          | 3.212(1) | 3.273(1) |
| Ni(1)···Ni(1)*     |           |          |          | 5.417(1) | 5.456(1) |
| Ni(2)···Ni(2)*     |           |          |          | 3.067(1) | 3.159(1) |
| Ni(2)···Ni(3)      |           |          | 3.136(1) |          |          |
| Ni(3)···Ni(4)      |           |          |          |          | 3.030(1) |
| Ni(3)···Ni(4)*     |           |          |          |          | 3.266(1) |
| Ni(3)···Ni(3)*     |           |          |          |          | 5.435(1) |
| Ni(4)···Ni(4)*     |           |          |          |          | 3.186(1) |
| <hr/>              |           |          |          |          |          |
| Ni(1)-O(2A)-Ni(2)  | 100.79(7) | 94.1(1)  | 101.0(1) | 94.8(1)  | 96.5(2)  |
| Ni(1)-O(3A)-Ni(2)  | 102.16(8) | 95.4(1)  |          |          |          |
| Ni(1)-O(3A)-Ni(2)* |           |          |          | 99.7(1)  | 102.9(2) |
| Ni(1)-O(1P)-Ni(2)  |           |          | 94.2(1)  |          |          |
| Ni(2)-O(2B)-Ni(3)  |           |          | 101.3(1) |          |          |
| Ni(2)-O(2P)-Ni(3)  |           |          | 95.0(1)  |          |          |
| Ni(1)-O(1M)-Ni(2)  |           |          |          | 93.8(1)  |          |
| Ni(1)-O(1M)-Ni(2)* |           |          |          | 103.8(1) |          |
| Ni(2)-O(1M)-Ni(2)* |           |          |          | 97.2(1)  |          |
| Ni(1)-N(1C)-Ni(2)  |           |          |          |          | 91.1(2)  |
| Ni(1)-N(1C)-Ni(2)* |           |          |          |          | 102.7(2) |
| Ni(2)-N(1C)-Ni(2)* |           |          |          |          | 97.3(2)  |
| Ni(3)-O(2D)-Ni(4)  |           |          |          |          | 95.9(2)  |
| Ni(3)-O(3D)-Ni(4)  |           |          |          |          | 101.9(2) |
| Ni(3)-N(1F)-Ni(4)  |           |          |          |          | 90.4(2)  |
| Ni(3)-N(1F)-Ni(4)* |           |          |          |          | 102.3(2) |
| Ni(4)-N(1F)-Ni(4)* |           |          |          |          | 97.5(2)  |

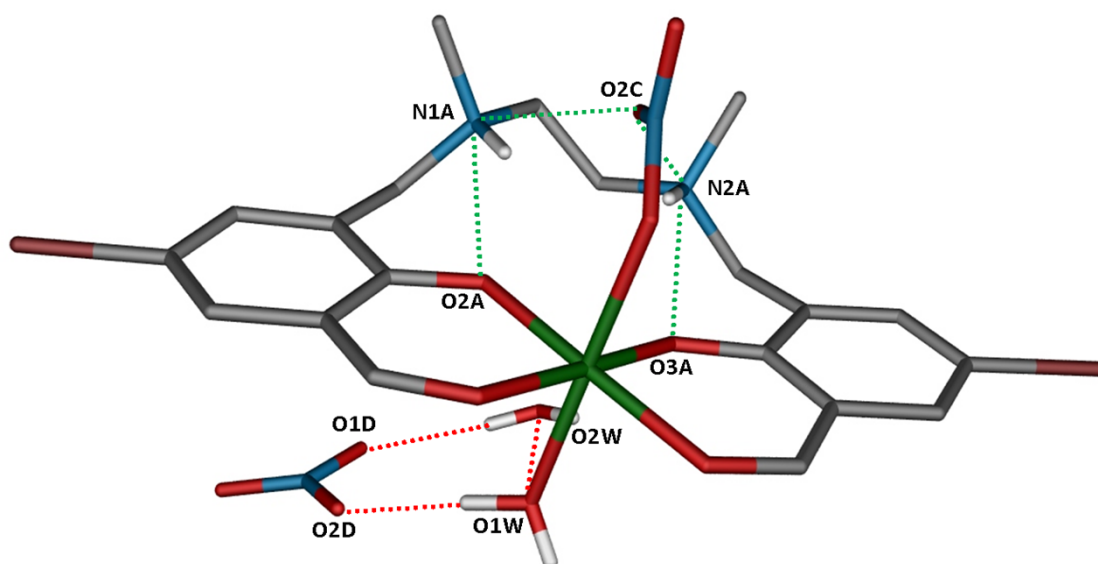

**Figure S1.** A perspective view of the structure of **1** together with intramolecular (green dotted lines) and intermolecular (red dotted lines) hydrogen bonds.

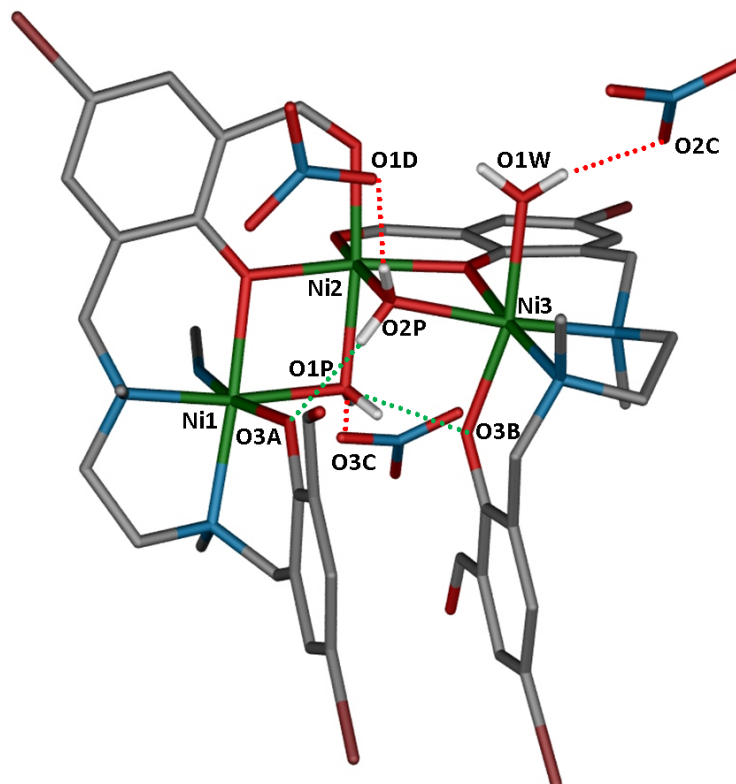

**Figure S2.** A perspective view of the structure of **4** together with intramolecular (green dotted lines) and intermolecular (red dotted lines) hydrogen bonds.

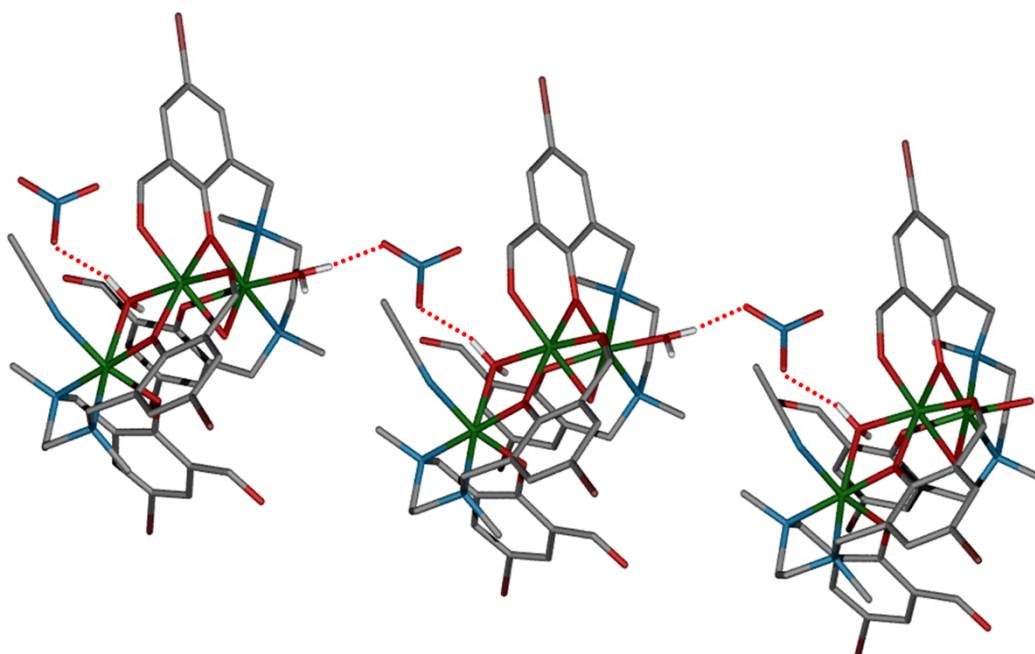

**Figure S3.** A perspective view of the structure of **4** together with intermolecular (red dotted lines) hydrogen bonds forming a chain running along the *b* axis.

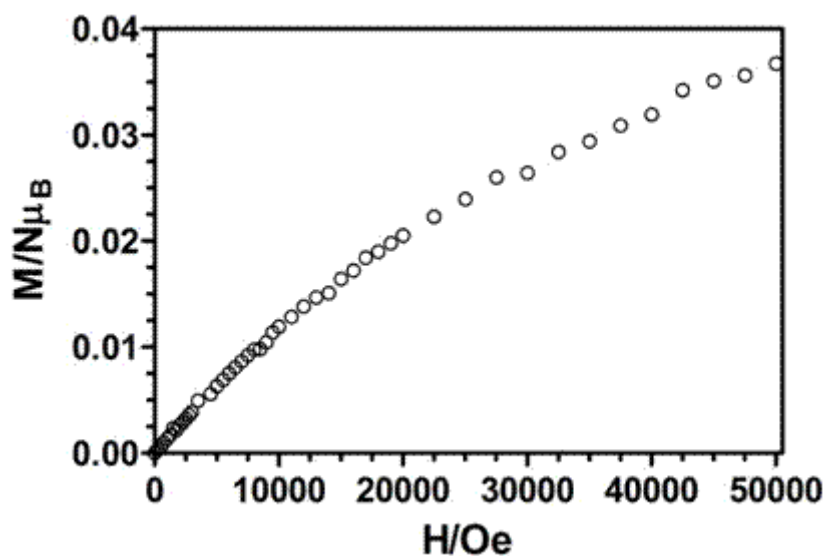

Figure S4. Field dependence of the magnetization for 2.

Table S3. Spin densities of compound 2-6.

| Atoms                        | 2                                            | 3                    | 4                                            | 5                                                | 6A                   | 6B                   |
|------------------------------|----------------------------------------------|----------------------|----------------------------------------------|--------------------------------------------------|----------------------|----------------------|
| Ni1                          | +1.6907                                      | +1.6554              | +1.6610                                      | -1.6873                                          | +1.6683              | +1.6711              |
| Ni2                          | -1.7206                                      | +1.7375              | -1.7230                                      | -1.7203                                          | +1.6797              | +1.6804              |
| Ni3                          | -                                            | -                    | +1.6718                                      | +1.6872                                          | +1.6683              | +1.6711              |
| Ni4                          | -                                            | -                    | -                                            | +1.7203                                          | +1.6797              | +1.6804              |
| O <sub>phenoxo</sub>         | +0.0083<br>-0.0059                           | +0.0900 <sup>a</sup> | +0.0624 <sup>a</sup><br>-0.0166 <sup>a</sup> | -0.0000 <sup>a,d</sup><br>+0.0001 <sup>a,d</sup> | +0.0758 <sup>a</sup> | +0.0722 <sup>a</sup> |
| O <sub>aldehyde</sub>        | -0.0380                                      | +0.0455 <sup>a</sup> | -0.0598                                      | -0.0344<br>+0.0344                               | +0.0414 <sup>a</sup> | +0.0449 <sup>a</sup> |
| O <sub>acetate</sub>         | -                                            | +0.0595 <sup>a</sup> | -                                            | -0.0410 <sup>a</sup><br>+0.0410 <sup>a</sup>     | +0.0474 <sup>a</sup> | +0.0472 <sup>a</sup> |
| O <sub>acac</sub>            | +0.0476 <sup>a</sup><br>-0.0592 <sup>a</sup> | -                    | -                                            | -                                                | -                    | -                    |
| O <sub>methoxide</sub>       | -                                            | -                    | -                                            | -0.0554<br>+0.0554                               | -                    | -                    |
| O <sub>water</sub>           | -0.0292                                      | -                    | -0.0592 <sup>a,c</sup><br>+0.0161            | -                                                | -                    | -                    |
| N <sub>en</sub> <sup>b</sup> | +0.0640 <sup>a</sup>                         | +0.0677 <sup>a</sup> | +0.0916 <sup>a</sup>                         | -0.0625 <sup>a</sup><br>+0.0626 <sup>a</sup>     | +0.0703 <sup>a</sup> | +0.0707 <sup>a</sup> |
| N <sub>SCN</sub>             | -                                            | +0.0690              | -                                            | -                                                | -                    | -                    |
| N <sub>acetonitrile</sub>    | -                                            | -                    | +0.0454                                      | -                                                | -                    | -                    |
| N <sub>azide</sub>           |                                              |                      |                                              |                                                  | +0.1944 <sup>e</sup> | +0.1889 <sup>e</sup> |

<sup>a</sup> Mean values. <sup>b</sup> From the ethylenediamine moiety of the ligand. <sup>c</sup> Bridged molecules. <sup>d</sup> Due to the symmetry of the system. <sup>e</sup> Sum of the three N atoms of the azide ligand.

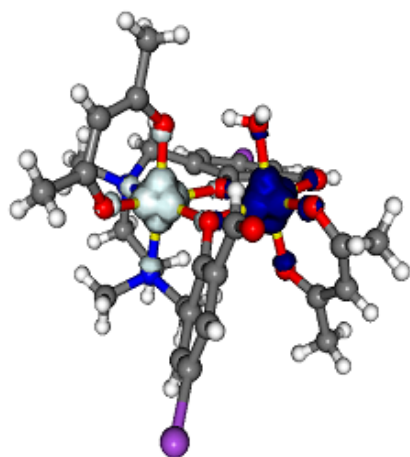

(2)

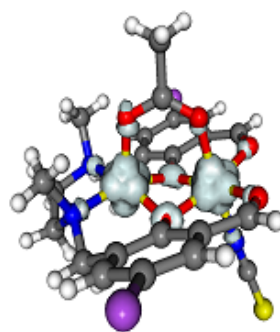

(3)

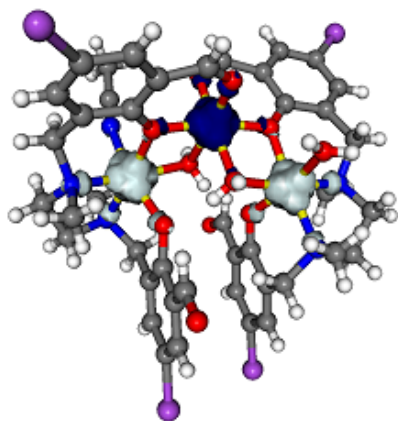

(4)

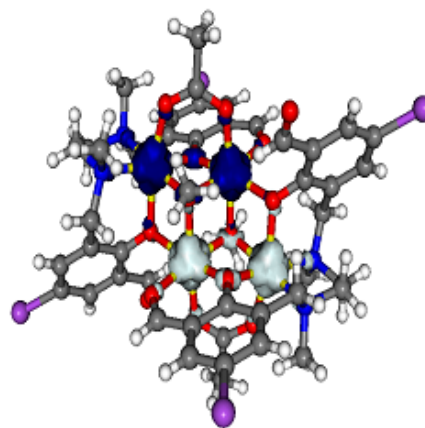

(5)

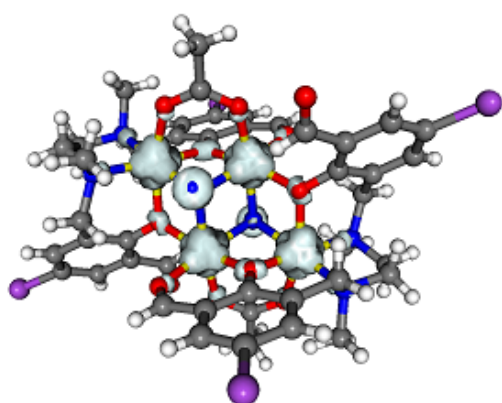

(6A)

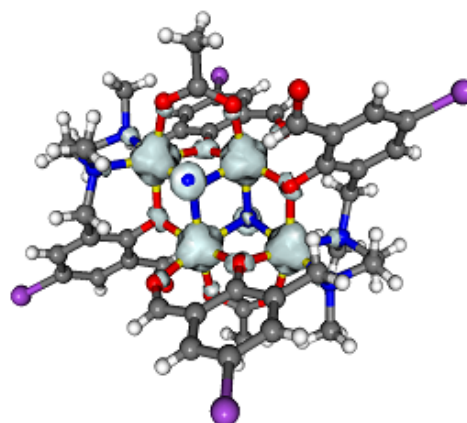

(6B)

**Figure S5.** Calculated spin densities for structures 2-6. The isodensity surfaces represented correspond to a cut-off value of  $0.012 \text{ e bohr}^{-3}$ . Grey and blue colors correspond to positive and negative values, respectively.
